# Supplementary material
Source: PubMed Central journal article supplement (PMC3042725)
Supplement: NIHMS268189-supplement-Supporting_Information.pdf [file NIHMS268189-supplement-Supporting_Information.pdf]

# **European Journal of Immunology**

**Supporting Information**

**for**

**DOI 10.1002/eji.201040796**

**Estrogen receptor- $\beta$  ligand treatment modulates dendritic cells in the target organ during autoimmune demyelinating disease**

Sienmi Du, Francisco Sandoval, Pauline Trinh, Elizabeth Umeda and  
Rhonda Voskuhl

## Supplementary Figure 1

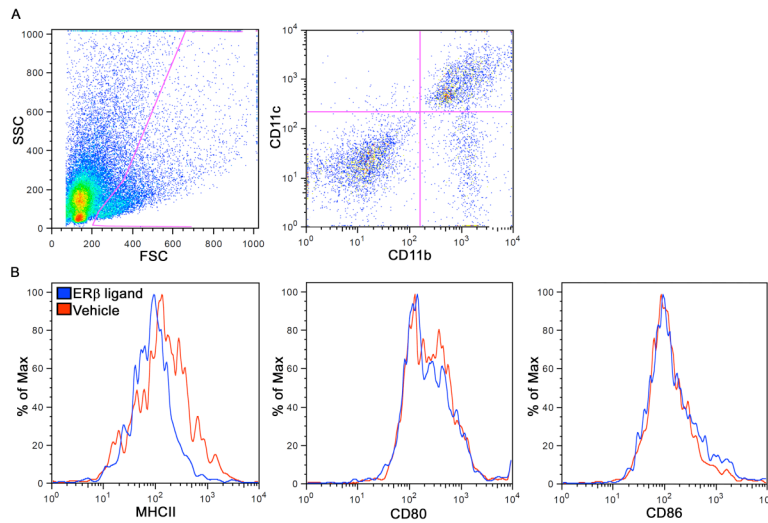

**Supplementary Figure 1. The expression of MHCII and co-stimulatory molecules on CNS DCs during ERβ ligand treatment.** Thy1-YFP transgenic mice treated with vehicle (red) or ERβ ligand (blue) were adoptively transferred with autoantigen-stimulated ERβ<sup>-/-</sup> LNCs (3x10<sup>6</sup> cells/mouse). CNS immune cells were pooled from 7-10 animals at disease onset (10 days post-adoptive transfer), stained with CD11b, CD11c, and MHCII, CD80, or CD86 and analyzed by flow cytometry. (A) Gating strategy for analysis of costimulatory molecules on CNS DCs. Live cells were defined by FSC and SSC parameters (left) and further gated on CD11b and CD11c positivity (right, upper right quadrant) for further analyses. (B) Histogram displaying expression of MHCII (left), CD80 (middle), and CD86 (right) on DCs in the CNS of ERβ ligand or vehicle-treated EAE mice gated in A.
